# Supplementary material for: In Silico and In Vitro Study of Antioxidant Potential of Urolithins
Source: MDPI journal article supplement (doi:10.3390/antiox12030697), 2023-03-11
Supplement: s1 [file s1]

## Supporting Information

# In Silico and In Vitro Study of Antioxidant Potential of Urolithins

Emanuela Marchese <sup>1</sup>, Valentina Orlandi <sup>2</sup>, Federica Turrini <sup>2</sup>, Isabella Romeo <sup>1,3,\*</sup>, Raffaella Boggia <sup>2,\*</sup>, Stefano Alcaro <sup>1,3,4</sup> and Giosuè Costa <sup>1,3</sup>

<sup>1</sup> Dipartimento di Scienze della Salute, Università degli Studi "Magna Græcia" di Catanzaro, Campus "S. Venuta", Viale Europa, 88100 Catanzaro, Italy

<sup>2</sup> Dipartimento di Farmacia, Università degli Studi di Genova, Viale Cembrano 4, 16148 Genova, Italy

<sup>3</sup> Net4Science Academic Spin-Off, Università degli Studi "Magna Græcia" di Catanzaro, Campus "S. Venuta", Viale Europa, 88100 Catanzaro, Italy

<sup>4</sup> Associazione CRISEA-Centro di Ricerca e Servizi Avanzati per l'innovazione Rurale, Loc. Condoleo, 88055 Belcastro, Italy

\* Correspondence: isabella.romeo@unicz.it (I.R.); raffaella.boggia@unige.it (R.B.)

## Contents

|                                                                                                                                                                                                                                                                                                        |   |
|--------------------------------------------------------------------------------------------------------------------------------------------------------------------------------------------------------------------------------------------------------------------------------------------------------|---|
| <b>Figure S1.</b> Distribution diagrams of UROs as function of pH. ....                                                                                                                                                                                                                                | 2 |
| <b>Figure S2.</b> Geometries of the transition states of URO-A, URO-B, URO-C and URO-D obtained for the HAT reaction pathways in pentyl ethanoate (PE). Bond lengths (purple), angles (green) and imaginary frequencies ( $\nu$ ) are reported in Å, degrees and $\text{cm}^{-1}$ , respectively. .... | 3 |
| <b>Table S1.</b> Nuclear organization term ( $\lambda$ ) for the calculation of the barrier of reaction in SET mechanism, computed using the Marcus theory. ....                                                                                                                                       | 4 |
| <b>Table S2.</b> Rate Constants ( $k_{app}$ ), expressed in $\text{M}^{-1} \text{s}^{-1}$ , in pentyl ethanoate and branching ratios ( $\Gamma$ ) computed at M05-2X level of theory at 298.15 K. ....                                                                                                 | 5 |
| <b>Figure S3.</b> Regression lines for the calculation of the IC50 values. ....                                                                                                                                                                                                                        | 6 |
| <b>Figure S4. a)</b> Calibration curve of FRAP assay; <b>b)</b> The microplate containing standards and samples at different concentrations. ....                                                                                                                                                      | 7 |

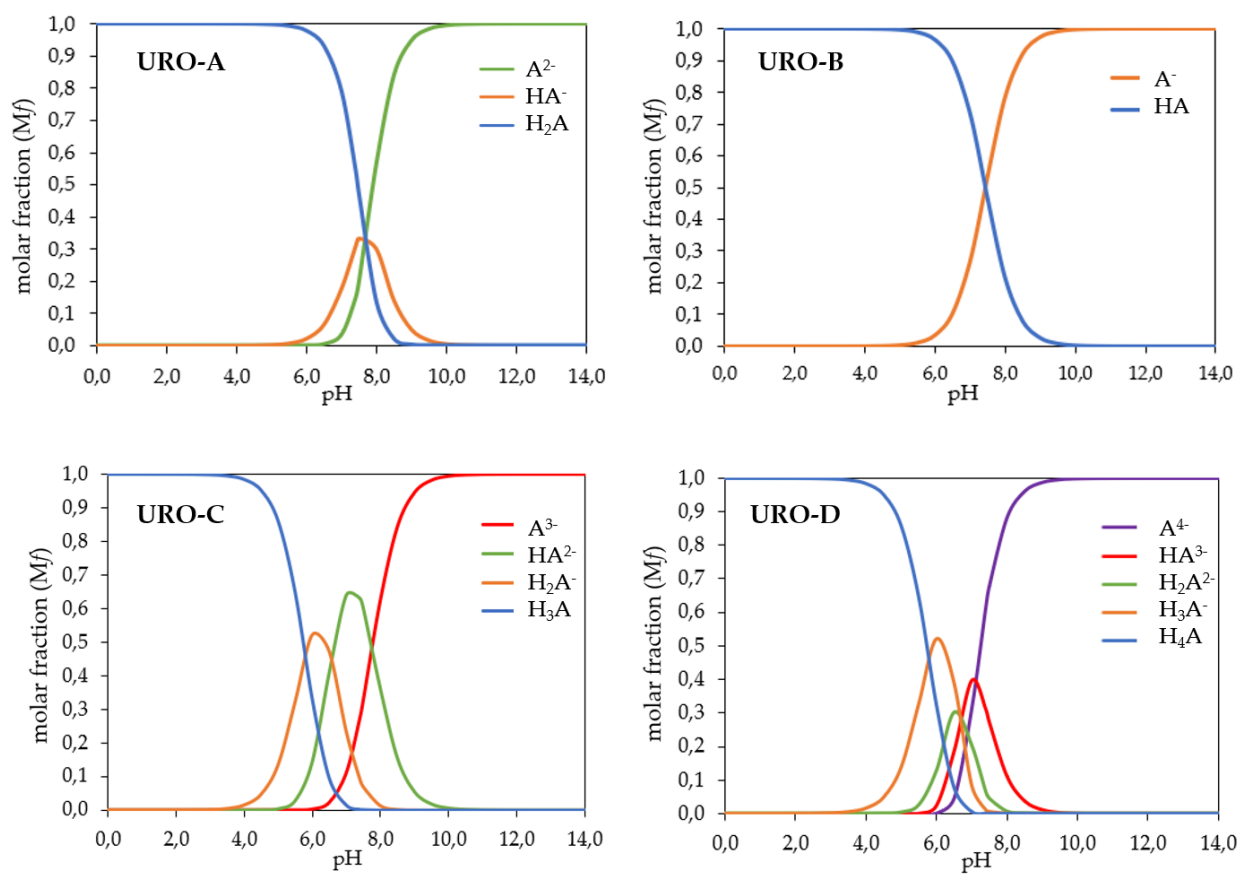

**Figure S1.** Distribution diagrams of UROs as function of pH.

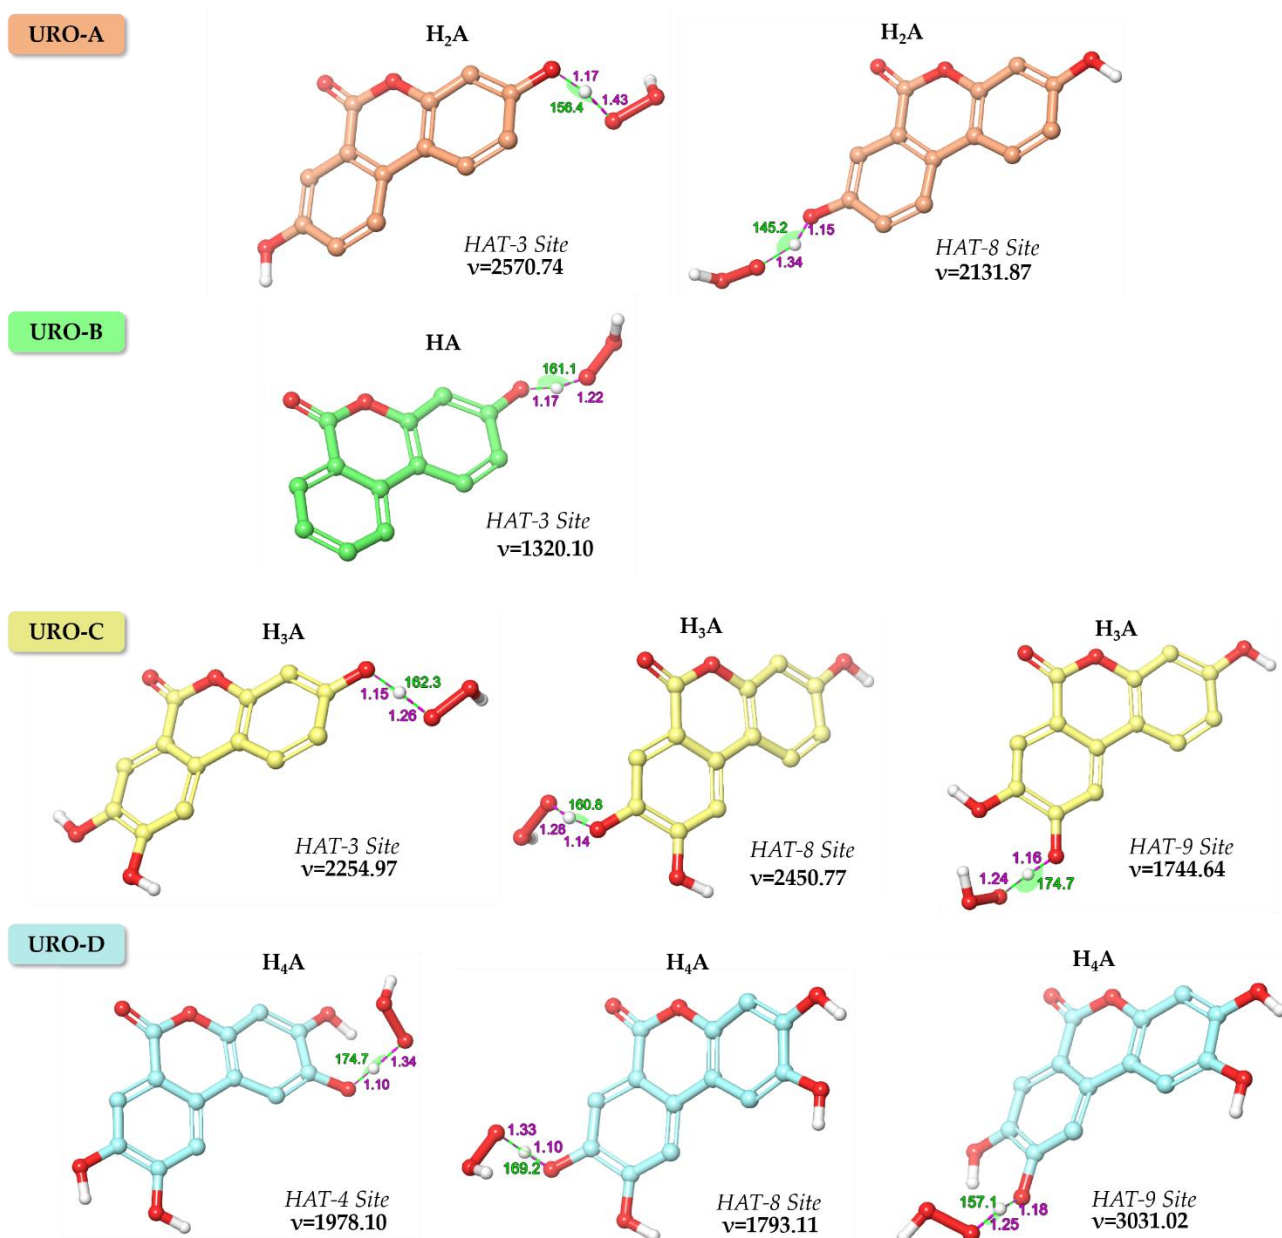

**Figure S2.** Geometries of the transition states of URO-A, URO-B, URO-C and URO-D obtained for the HAT reaction pathways in pentyl ethanoate (PE). Bond lengths ( $\text{\AA}$ ), angles (degrees) and imaginary frequencies ( $\nu$ ) are reported in  $\text{\AA}$ , degrees and  $\text{cm}^{-1}$ , respectively.

**Table S1.** Nuclear organization term ( $\lambda$ ) for the calculation of the barrier of reaction in SET mechanism, computed using the Marcus theory.

|              | specie                        | $\Delta G^\circ$ | $\Delta E$ | $\lambda$ | $\Delta G^\ddagger$ |
|--------------|-------------------------------|------------------|------------|-----------|---------------------|
| <b>URO-A</b> | HA <sup>-</sup>               | -10.83           | 29.83      | 40.66     | 5,47                |
| <b>URO-B</b> | HA                            | -5.03            | 89.66      | 94.69     | 21.23               |
| <b>URO-C</b> | H <sub>2</sub> A <sup>-</sup> | -7.70            | 34.61      | 42.31     | 7.08                |
|              | H <sub>3</sub> A <sup>-</sup> | -25.04           | 19.89      | 44,93     | 2.20                |
| <b>URO-D</b> | HA <sup>3-</sup>              | -16.73           | -4.43      | 12,30     | 0,40                |
|              | A <sup>4-</sup>               | -22.20           | -10.38     | 11.82     | 2.28                |

**Table S2.** Rate Constants ( $k_{app}$ ), expressed in  $M^{-1} s^{-1}$ , in pentyl ethanoate and branching ratios ( $\Gamma$ ) computed at M05-2X level of theory at 298.15 K.

|              | Mechanism | site | $k_{app}$              | $\Gamma(\%)$ |
|--------------|-----------|------|------------------------|--------------|
| <b>URO-A</b> | HAT       | 3    | $1.72 \times 10^{-10}$ | ~0.00        |
|              | HAT       | 8    | $4.27 \times 10^{-6}$  | 100.00       |
| <b>URO-B</b> | HAT       | 3    | $4.97 \times 10^{-8}$  | 100.00       |
| <b>URO-C</b> | HAT       | 3    | $6.15 \times 10^{-11}$ | 0.04         |
|              | HAT       | 4    | $5.70 \times 10^{-12}$ | ~0.00        |
|              | HAT       | 8    | $1.48 \times 10^{-7}$  | 99.95        |
| <b>URO-D</b> | HAT       | 4    | $6.30 \times 10^1$     | 96.06        |
|              | HAT       | 8    | $2.62 \times 10^{-2}$  | 0.04         |
|              | HAT       | 9    | $2.56 \times 10^1$     | 3.90         |

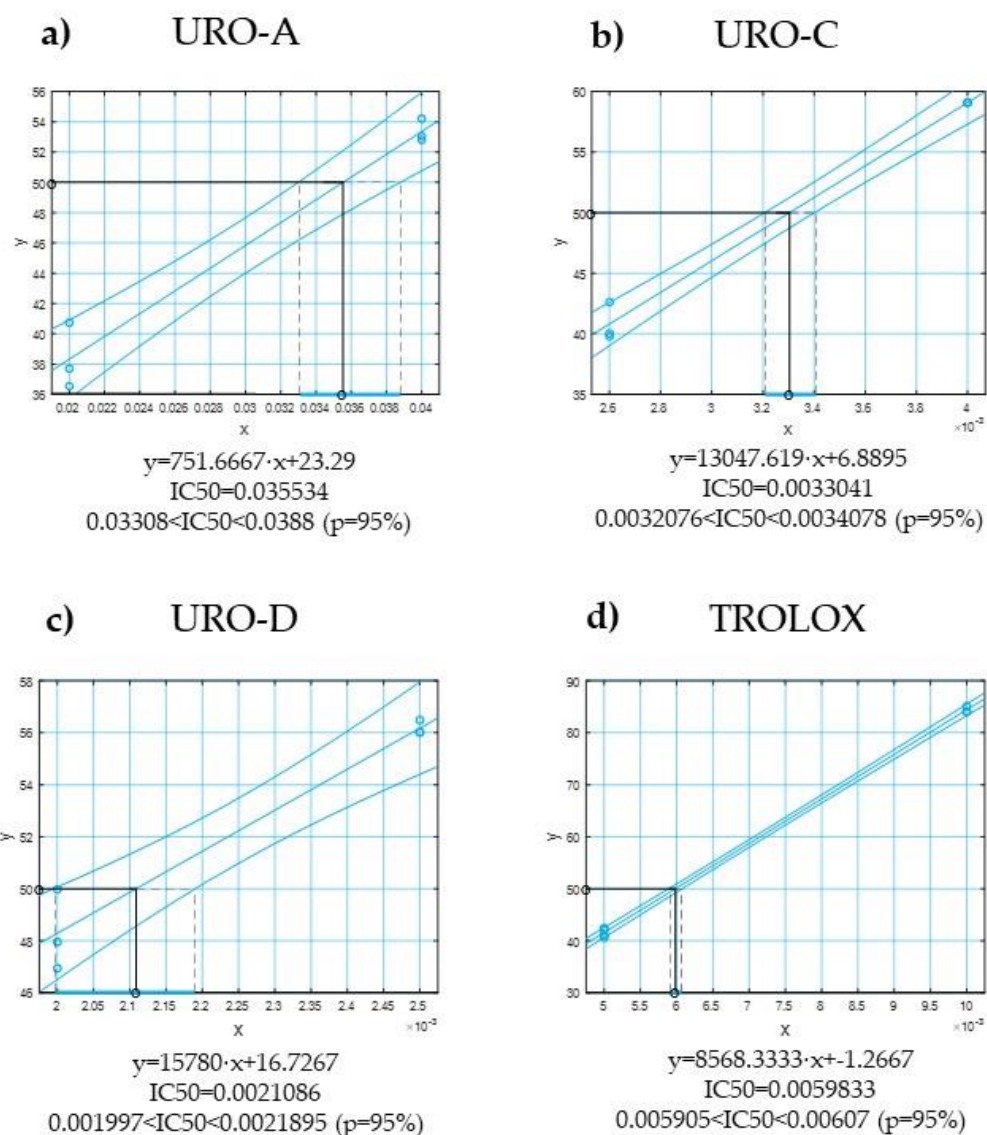

**Figure S3.** Regression lines for the calculation of the  $IC_{50}$  values.

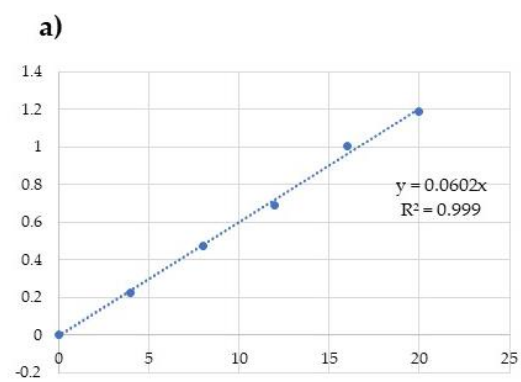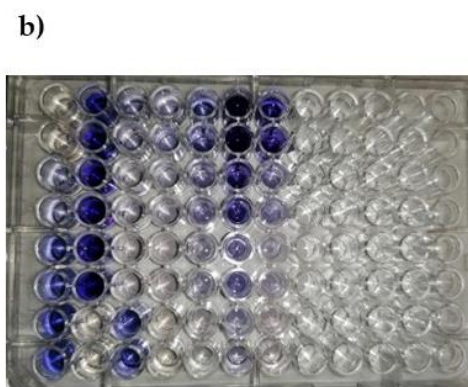

**Figure S4.** (a) Calibration curve of FRAP assay; (b) The microplate containing standards and samples at different concentrations.
